# Supplementary material for: Mapping of Nematode Resistance in Hexaploid Sweetpotato Using a Next-Generation Sequencing-Based Association Study
Source: Front Plant Sci. 2022 Mar 18;13:858747. doi: 10.3389/fpls.2022.858747 (PMC8972059; doi:10.3389/fpls.2022.858747)
Supplement: Supplementary file 2 [file Data_Sheet_2.xlsx]

## Sheet: Table_S1
Supplementary Table 1. Number of egg masses in the parental cultivars and F1 lines.
Name	No. of egg masses
J-Red	1.3
Choshu	192
JC001	4.66667
JC002	17.0625
JC003	59.9167
JC004	18.25
JC006	53.2222
JC007	35.4375
JC008	0.166667
JC009	2.9
JC010	4.8
JC013	66.2
JC014	46.625
JC015	117.667
JC016	1.75
JC017	13.25
JC018	128.75
JC019	20.4
JC021	52.6667
JC023	47.375
JC024	13.5
JC025	0.75
JC026	12.875
JC027	54
JC028	11
JC030	0.75
JC031	0.833333
JC032	0.333333
JC033	16
JC034	120.6
JC035	68
JC036	52.375
JC037	26.75
JC038	17.375
JC039	3
JC040	15.7
JC041	0.25
JC042	4.5
JC043	5.375
JC045	1
JC046	0.333333
JC047	152
JC048	59
JC049	46.75
JC050	116.812
JC051	7.5
JC052	55.4
JC053	32.75
JC054	0
JC055	0.5
JC056	124
JC101	3.375
JC102	58
JC103	16.5
JC104	67.25
JC105	34
JC106	143
JC107	99.5
JC108	0.75
JC109	39.75
JC110	17.7
JC111	124.5
JC112	0.25
JC113	4.2
JC115	95
JC116	64.1667
JC117	178.75
JC118	0.25
JC120	4
JC121	48
JC122	6.375
JC123	99.25
JC124	169.167
JC125	0.75
JC126	25.5
JC127	145
JC128	193.25
JC129	128.5
JC130	68.5
JC132	84
JC133	162.667
JC134	91.5
JC135	0.5
JC136	24.1667
JC137	43.75
JC138	2
JC139	101.333
JC141	54.5
JC142	30.75
JC143	19
JC144	74.75
JC145	117.5
JC146	205
JC147	1.5
JC148	58.25
JC149	75.6667
JC150	7.25
JC151	15
JC152	42
JC154	143
JC155	4
JC156	21.5
JC157	50
JC159	4.66667
JC160	19.5

## Sheet: Table_S2
Supplementary Table 2. Number of original and filtered reads.
	No. of original read pairs	No. of original reads	No. of filtered read pairs	No. of filtered reads	Ratio (%)
Choshu	7541889	15083778	7030262	14060524	93.2162
JC001	8284843	16569686	7649440	15298880	92.3305
JC003	9326260	18652520	8663835	17327670	92.8972
JC004	11222116	22444232	10550485	21100970	94.0151
JC005	1364197	2728394	1267966	2535932	92.946
JC006	10117488	20234976	9459101	18918202	93.4926
JC007	8720750	17441500	8166455	16332910	93.644
JC008	11456646	22913292	10852010	21704020	94.7224
JC009	5177563	10355126	4793019	9586038	92.5729
JC010	7447373	14894746	7003606	14007212	94.0413
JC013	9247546	18495092	8715783	17431566	94.2497
JC014	6627223	13254446	6216947	12433894	93.8092
JC015	9749607	19499214	9188016	18376032	94.2399
JC016	7388763	14777526	6954260	13908520	94.1194
JC017	9998460	19996920	9503006	19006012	95.0447
JC018	8562499	17124998	8099690	16199380	94.5949
JC019	8282290	16564580	7773401	15546802	93.8557
JC021	4719548	9439096	4406754	8813508	93.3724
JC022	1041102	2082204	966759	1933518	92.8592
JC023	10137523	20275046	9493427	18986854	93.6464
JC024	10691217	21382434	10015435	20030870	93.6791
JC025	11215670	22431340	10548520	21097040	94.0516
JC026	11277881	22555762	10640230	21280460	94.346
JC027	11503296	23006592	10835712	21671424	94.1966
JC028	10623220	21246440	9913776	19827552	93.3218
JC030	8458640	16917280	7847715	15695430	92.7775
JC031	8660159	17320318	8166241	16332482	94.2967
JC032	9749879	19499758	9079763	18159526	93.1269
JC033	9155467	18310934	8575096	17150192	93.6609
JC034	10434564	20869128	9797378	19594756	93.8935
JC035	8217208	16434416	7634712	15269424	92.9113
JC036	10110108	20220216	9416734	18833468	93.1418
JC037	11234943	22469886	10535157	21070314	93.7713
JC038	9775040	19550080	9140223	18280446	93.5057
JC039	8723880	17447760	8198505	16397010	93.9777
JC040	9321782	18643564	8688978	17377956	93.2116
JC041	9990783	19981566	9354947	18709894	93.6358
JC042	10031650	20063300	9361344	18722688	93.3181
JC043	10166386	20332772	9579966	19159932	94.2318
JC045	9170959	18341918	8629072	17258144	94.0913
JC046	11147267	22294534	10500492	21000984	94.1979
JC047	8626506	17253012	8149845	16299690	94.4745
JC048	9789661	19579322	9249595	18499190	94.4833
JC049	10500874	21001748	9943465	19886930	94.6918
JC050	10113649	20227298	9593182	19186364	94.8538
JC051	1545797	3091594	1434105	2868210	92.7745
JC052	9305477	18610954	8687111	17374222	93.3548
JC053	1844580	3689160	1708353	3416706	92.6147
JC054	10080060	20160120	9471691	18943382	93.9646
JC055	10822925	21645850	10235334	20470668	94.5709
JC056	7474546	14949092	7144997	14289994	95.591
JC057	1136186	2272372	1053263	2106526	92.7016
JC101	6826671	13653342	6399395	12798790	93.7411
JC102	9172991	18345982	8665347	17330694	94.4659
JC103	10065933	20131866	9578567	19157134	95.1583
JC104	8373296	16746592	7895209	15790418	94.2903
JC105	8128963	16257926	7636403	15272806	93.9407
JC106	8379631	16759262	7887730	15775460	94.1298
JC107	8569075	17138150	8074573	16149146	94.2292
JC108	7388233	14776466	6939795	13879590	93.9304
JC109	7431057	14862114	6976795	13953590	93.887
JC110	9029899	18059798	8512094	17024188	94.2657
JC111	10221170	20442340	9563920	19127840	93.5697
JC112	10386755	20773510	9731511	19463022	93.6915
JC113	9638867	19277734	9097557	18195114	94.3841
JC115	8374315	16748630	7836764	15673528	93.581
JC116	10763804	21527608	10179083	20358166	94.5677
JC117	8841583	17683166	8233458	16466916	93.122
JC118	6462360	12924720	6088556	12177112	94.2157
JC119	1035586	2071172	953596	1907192	92.0827
JC120	7831644	15663288	7350291	14700582	93.8537
JC121	7960269	15920538	7450362	14900724	93.5943
JC122	7492504	14985008	6989615	13979230	93.2881
JC123	8274871	16549742	7742518	15485036	93.5666
JC124	8004817	16009634	7522169	15044338	93.9705
JC125	8851384	17702768	8366725	16733450	94.5245
JC126	7436171	14872342	6963050	13926100	93.6376
JC127	9167603	18335206	8567598	17135196	93.4552
JC128	8729282	17458564	8189472	16378944	93.8161
JC129	9899366	19798732	9217261	18434522	93.1096
JC130	10606420	21212840	9946707	19893414	93.7801
JC132	6634974	13269948	6195369	12390738	93.3744
JC133	10693307	21386614	10140052	20280104	94.8262
JC134	10292383	20584766	9885605	19771210	96.0478
JC135	9163861	18327722	8511217	17022434	92.8781
JC136	9107126	18214252	8605936	17211872	94.4967
JC137	9975270	19950540	9438897	18877794	94.623
JC138	10290757	20581514	9715267	19430534	94.4077
JC139	10140422	20280844	9473689	18947378	93.425
JC141	10877949	21755898	10220152	20440304	93.9529
JC142	9146873	18293746	8574794	17149588	93.7456
JC143	10646235	21292470	9998370	19996740	93.9146
JC144	8891940	17783880	8402027	16804054	94.4904
JC145	8077047	16154094	7515409	15030818	93.0465
JC146	9625092	19250184	8993285	17986570	93.4358
JC147	9566188	19132376	8982819	17965638	93.9018
JC148	9659944	19319888	8940508	17881016	92.5524
JC149	9011204	18022408	8449829	16899658	93.7703
JC150	8261956	16523912	7725525	15451050	93.5072
JC151	9652112	19304224	9057655	18115310	93.8412
JC152	7696410	15392820	7182949	14365898	93.3286
JC154	4775533	9551066	4464880	8929760	93.4949
JC155	10536892	21073784	9945978	19891956	94.392
JC156	12958219	25916438	12186230	24372460	94.0425
JC157	9138841	18277682	8522285	17044570	93.2535
JC159	9310939	18621878	8715323	17430646	93.6031
JC160	10195729	20391458	9532127	19064254	93.4914
JRed	8349110	16698220	7824734	15649468	93.7194
Total	943334779	1886669558	885642191	1771284382	93.8009

## Sheet: Table_S3
Supplementary Table 3. Alignment rate of the ddRAD-seq reads.
Name	Alignment rate (%)
Choshu	94.54
JC001	95.95
JC003	93.89
JC004	95.13
JC005	90.27
JC006	95.39
JC007	95.73
JC008	95.75
JC009	93.39
JC010	95.02
JC013	95.64
JC014	93.07
JC015	90.03
JC016	94.75
JC017	93.66
JC018	94.57
JC019	95.54
JC021	93.68
JC022	95.55
JC023	91.59
JC024	91.55
JC025	94.69
JC026	94.52
JC027	95.39
JC028	94.71
JC030	95.47
JC031	95.69
JC032	95.8
JC033	92.89
JC034	93.16
JC035	95.21
JC036	94.59
JC037	94.24
JC038	94.45
JC039	94.28
JC040	94.8
JC041	95.02
JC042	94.65
JC043	95.89
JC045	95.04
JC046	95.04
JC047	94.63
JC048	94.25
JC049	94.27
JC050	95.39
JC051	92.13
JC052	92.59
JC053	86.02
JC054	93.59
JC055	94.54
JC056	94.22
JC057	77.55
JC101	95.85
JC102	96.51
JC103	96.65
JC104	96.55
JC105	96.36
JC106	96.5
JC107	96.59
JC108	96.46
JC109	96.67
JC110	96.66
JC111	96.53
JC112	96.27
JC113	96.48
JC115	96.34
JC116	96.53
JC117	96.51
JC118	96.73
JC119	96.14
JC120	96.51
JC121	96.62
JC122	95.69
JC123	96.38
JC124	96.55
JC125	96.54
JC126	96.13
JC127	96.15
JC128	96.51
JC129	94.69
JC130	96.22
JC132	95.59
JC133	96.09
JC134	95.31
JC135	95.65
JC136	96.86
JC137	96.76
JC138	96.58
JC139	95.29
JC141	95.92
JC142	92.3
JC143	92.47
JC144	96.45
JC145	90.73
JC146	94.46
JC147	94.54
JC148	85.67
JC149	95.58
JC150	93.64
JC151	95.61
JC152	92.42
JC154	94.01
JC155	91.97
JC156	93.53
JC157	91.85
JC159	95.12
JC160	94.68
JRed	95.68
average	94.6156

## Sheet: Table_S4
Supplementary Table 4. Chr07_1778460 SNP genotype and the number of egg masses in each line in the F1 population.
	Genotype							No. of egg masses*
	AAAAAA	AAAAAa	AAAAaa	AAAaaa	AAaaaa	Aaaaaa	aaaaaa
JRed	0	9.80797e-131	3.27339e-68	8.03254e-34	3.21053e-12	1	1.1685e-54	1.29412
JC054	0	2.51084e-136	3.27339e-72	1.28521e-36	8.21896e-14	1	1.86213e-45	0
JC008	0	3.74144e-118	3.27339e-59	1.56885e-27	1.22472e-08	1	2.30287e-75	0.166667
JC118	0	7.66248e-126	1.30936e-64	3.0122e-31	1.00329e-10	1	8.79008e-64	0.25
JC041	0	1.82688e-110	1.99792e-54	1.40108e-24	3.64995e-07	1	1.62125e-80	0.25
JC112	0	1.78402e-103	1.24867e-49	2.43238e-21	2.2277e-05	0.999978	7.0789e-90	0.25
JC046	0	8.22752e-147	1.30936e-79	9.87038e-42	1.07728e-16	1	2.83743e-29	0.333333
JC032	0	5.86164e-77	1.49255e-34	5.91621e-13	0.0968718	0.903128	6.50652e-93	0.333333
JC135	0	2.39452e-122	3.12175e-63	6.64217e-31	7.4751e-11	1	9.54037e-58	0.5
JC055	0	1.19726e-121	1.30936e-61	3.76525e-29	1.56764e-09	1	1.10206e-70	0.5
JC025	0	0	0	0	0	1	0	0.75
JC108	0	1.56928e-133	5.23742e-70	5.78343e-35	8.21896e-13	1	3.35519e-52	0.75
JC125	0	1.1692e-114	1.30936e-56	1.17664e-25	1.5309e-07	1	3.46122e-82	0.75
JC031	0	1.95484e-94	4.7012e-42	1.93391e-15	0.102383	0.897617	1.15381e-116	0.833333
JC045	0	1.00434e-137	5.23742e-73	4.62674e-37	5.26014e-14	1	2.67611e-45	1
JC147	0	4.56717e-109	1.30935e-52	7.35396e-23	5.98005e-06	0.999994	2.17192e-91	1.5
JC016	0	1.56928e-133	5.23742e-70	5.78343e-35	8.21896e-13	1	3.35519e-52	1.75
JC039	0	2.39452e-122	3.27339e-62	1.25508e-29	7.83821e-10	1	1.83677e-68	3
JC155	0	9.80797e-131	3.27339e-68	8.03254e-34	3.21053e-12	1	1.1685e-54	4
JC042	0	2.3384e-115	5.23742e-57	7.05985e-26	1.22472e-07	1	4.14931e-82	4.5
JC159	0	1.1692e-114	3.19667e-57	2.01756e-26	3.73755e-08	1	9.30112e-76	4.66667
JC028	0	1.82688e-110	1.13569e-56	2.18005e-27	2.07476e-09	1	6.08097e-57	11
JC026	0	9.35361e-117	5.23742e-58	1.41197e-26	4.89888e-08	1	8.29032e-80	12.875
JC151	0	3.74144e-118	5.23742e-59	2.82394e-27	1.95955e-08	1	1.65641e-77	15
JC103	0	1.4615e-112	5.23742e-55	1.76496e-24	7.6545e-07	0.999999	1.0394e-86	16.5
JC143	0	4.78905e-123	1.30936e-62	7.5305e-30	6.27057e-10	1	2.20192e-68	19
JC160	0	2.45199e-129	5.23742e-67	7.22928e-33	1.28421e-11	1	4.20659e-59	19.5
JC019	0	1.82687e-110	1.30935e-53	1.4708e-23	2.39203e-06	0.999998	4.33952e-89	20.4
JC156	0	2.923e-113	2.09497e-55	1.05898e-24	6.1236e-07	0.999999	1.24604e-86	21.5
JC105	0	1.28555e-142	1.30936e-76	1.2338e-39	1.68324e-15	1	3.55745e-36	34
JC109	0	1.87072e-117	1.30936e-58	4.70656e-27	2.44944e-08	1	1.38172e-77	39.75
JC023	0	3.83124e-125	3.27339e-64	5.02034e-31	1.25411e-10	1	7.3324e-64	47.375
JC006	0	3.83124e-125	3.27339e-64	5.02034e-31	1.25411e-10	1	7.3324e-64	53.2222
JC141	0	7.3075e-112	2.09497e-54	5.29488e-24	1.5309e-06	0.999998	6.23642e-89	54.5
JC048	0	4.78905e-123	2.09497e-62	1.35549e-29	1.00329e-09	1	1.5838e-70	59
JC116	0	1.226e-128	2.09497e-66	2.16878e-32	2.56843e-11	1	2.52396e-61	64.1667
JC013	0	1.82687e-110	8.18346e-54	8.17111e-24	1.49502e-06	0.999999	6.03315e-87	66.2
JC035	0	5.70882e-107	5.23727e-51	1.10307e-21	2.98995e-05	0.99997	6.52214e-96	68
JC149	0	1.226e-128	8.18348e-67	6.69378e-33	1.00329e-11	1	4.8785e-57	75.6667
JC115	0	1.1692e-114	8.18348e-57	6.53689e-26	9.56813e-08	1	4.81206e-80	95
JC123	0	4.01735e-139	1.27867e-74	1.58667e-38	5.13685e-15	1	1.43683e-36	99.25
JC145	0	3.06499e-127	1.30936e-65	6.0244e-32	4.01317e-11	1	1.75626e-61	117.5
JC111	0	4.6768e-116	2.09497e-57	4.23591e-26	9.79777e-08	1	4.97419e-82	124.5
JC133	0	1.60694e-140	3.27339e-75	1.02816e-38	5.26014e-15	1	1.48524e-38	162.667
Choshu	0	0	0	0	0	0	1	192
JC138	0	0	0	0	0	0	1	2
JC120	0	0	0	0	0	0	1	4
JC113	0	7.19481e-191	3.33241e-115	4.44506e-71	6.02917e-40	3.97668e-16	1	4.2
JC010	0	0	0	0	0	0	1	4.8
JC043	0	0	0	0	0	0	1	5.375
JC122	0	0	0	0	0	0	1	6.375
JC150	0	0	0	0	0	0	1	7.25
JC017	0	0	0	0	0	0	1	13.25
JC024	0	0	0	0	0	0	1	13.5
JC033	0	0	0	0	0	0	1	16
JC038	0	0	0	0	0	0	1	17.375
JC110	0	0	0	0	0	0	1	17.7
JC004	0	0	0	0	0	0	1	18.25
JC136	0	0	0	0	0	0	1	24.1667
JC126	0	0	0	0	0	0	1	25.5
JC037	0	0	0	0	0	0	1	26.75
JC142	0	0	0	0	0	0	1	30.75
JC007	0	0	0	0	0	0	1	35.4375
JC152	0	0	0	0	0	0	1	42
JC137	0	0	0	0	0	0	1	43.75
JC014	0	0	0	0	0	0	1	46.625
JC049	0	0	0	0	0	0	1	46.75
JC121	0	0	0	0	0	0	1	48
JC157	0	0	0	0	0	0	1	50
JC036	0	4.2908e-162	1.446e-97	5.88723e-60	1.90352e-33	3.25949e-13	1	52.375
JC021	0	0	0	0	0	0	1	52.6667
JC027	0	0	0	0	0	0	1	54
JC052	0	0	0	0	0	0	1	55.4
JC102	0	1.54942e-188	8.97054e-114	3.54539e-70	2.02874e-39	6.85111e-16	1	58
JC148	0	0	0	0	0	0	1	58.25
JC104	0	0	0	0	0	0	1	67.25
JC130	0	0	0	0	0	0	1	68.5
JC144	0	0	0	0	0	0	1	74.75
JC132	0	0	0	0	0	0	1	84
JC134	0	0	0	0	0	0	1	91.5
JC107	0	5.97297e-167	1.64896e-99	2.90353e-60	1.11139e-32	8.86199e-12	1	99.5
JC139	0	0	0	0	0	0	1	101.333
JC050	0	0	0	0	0	0	1	116.812
JC015	0	1.11165e-176	1.53447e-107	3.64761e-67	1.32381e-38	1.28855e-16	1	117.667
JC034	0	0	0	0	0	0	1	120.6
JC056	0	0	0	0	0	0	1	124
JC129	0	0	0	0	0	0	1	128.5
JC018	0	0	0	0	0	0	1	128.75
JC106	0	1.29118e-185	5.98036e-111	1.7727e-67	6.76248e-37	1.14185e-13	1	143
JC154	0	0	0	0	0	0	1	143
JC127	0	2.58495e-189	2.99317e-114	1.77447e-70	1.35385e-39	5.71497e-16	1	145
JC047	0	1.54942e-188	8.97054e-114	3.54539e-70	2.02874e-39	6.85111e-16	1	152
JC124	0	0	0	0	0	0	1	169.167
JC117	0	1.43313e-166	2.41482e-101	2.94951e-63	2.54311e-36	1.36084e-15	1	178.75
JC128	0	0	0	0	0	0	1	193.25
JC146	0	0	0	0	0	0	1	205
JC030	NA	NA	NA	NA	NA	NA	NA	0.75
JC009	NA	NA	NA	NA	NA	NA	NA	2.9
JC101	NA	NA	NA	NA	NA	NA	NA	3.375
JC001	NA	NA	NA	NA	NA	NA	NA	4.66667
JC051	NA	NA	NA	NA	NA	NA	NA	7.5
JC040	NA	NA	NA	NA	NA	NA	NA	15.7
JC053	NA	NA	NA	NA	NA	NA	NA	32.75
JC003	NA	NA	NA	NA	NA	NA	NA	59.9167

## Sheet: Table_S5
Supplementary Table 5. Chr03_18847788 SNP genotype and the number of egg masses in each line in the F1 population.
	Genotype							No. of egg masses
	BBBBBB	BBBBBb	BBBBbb	BBBbbb	BBbbbb	Bbbbbb	bbbbbb
JRed	0	9.80797e-131	7.99168e-69	1.37732e-34	7.83821e-13	1	3.14003e-48	1.29412
JC054	0	2.39452e-122	5.23742e-62	2.25915e-29	1.25411e-09	1	1.32115e-70	0
JC008	0	9.13437e-110	2.04587e-53	1.36185e-23	1.86877e-06	0.999998	5.03265e-87	0.166667
JC041	0	5.02168e-137	5.11467e-73	2.38001e-37	2.56843e-14	1	4.3148e-41	0.25
JC112	0	3.65375e-111	1.27867e-54	1.51317e-24	4.67194e-07	1	1.39796e-82	0.25
JC046	0	8.03469e-140	3.19667e-75	5.28891e-39	2.56843e-15	1	2.39471e-34	0.333333
JC032	0	2.85439e-106	1.30931e-50	1.83843e-21	3.73741e-05	0.999963	5.44051e-96	0.333333
JC135	0	1.19726e-121	1.30936e-61	3.76525e-29	1.56764e-09	1	1.10206e-70	0.5
JC055	0	5.56883e-100	2.04354e-46	1.06274e-18	0.00113931	0.998861	3.95489e-103	0.5
JC025	0	1.56928e-133	1.27867e-70	9.91671e-36	2.00658e-13	1	9.01619e-46	0.75
JC125	0	9.80797e-131	2.04587e-68	4.46252e-34	2.00658e-12	1	1.62454e-52	0.75
JC108	0	9.35361e-117	2.04587e-58	4.35793e-27	1.91363e-08	1	1.60242e-75	0.75
JC031	0	1.21212e-84	6.62803e-38	4.09512e-14	0.0881016	0.911898	9.29501e-103	0.833333
JC045	0	1.02844e-144	2.04587e-78	4.56962e-41	2.10405e-16	1	1.64697e-29	1
JC147	0	1.10203e-89	2.07054e-39	4.98507e-14	0.352283	0.647717	2.33992e-117	1.5
JC138	0	6.42775e-142	3.27339e-76	2.05633e-39	2.10405e-15	1	2.96751e-36	2
JC039	0	3.48413e-97	2.97682e-46	1.3408e-19	0.000103727	0.999896	1.92447e-88	3
JC101	0	1.35978e-91	7.2612e-43	1.43562e-17	0.000988344	0.999012	3.24229e-91	3.375
JC120	0	1.02844e-144	3.27339e-78	8.22532e-41	3.36649e-16	1	1.18463e-31	4
JC155	0	1.1692e-114	8.18348e-57	6.53689e-26	9.56813e-08	1	4.81206e-80	4
JC001	0	1.19726e-121	8.18348e-62	2.09181e-29	9.79777e-10	1	1.53218e-68	4.66667
JC043	0	8.03469e-140	1.30936e-74	3.08449e-38	1.05203e-14	1	8.91144e-41	5.375
JC150	0	1.82688e-110	5.11467e-54	4.53951e-24	9.34387e-07	0.999999	8.38776e-85	7.25
JC028	0	2.99316e-120	3.19667e-61	3.2281e-29	9.56813e-10	1	1.48223e-66	11
JC017	0	3.13855e-134	1.30936e-70	1.92781e-35	4.10948e-13	1	5.59198e-50	13.25
JC024	0	1.82688e-110	1.99792e-54	1.40108e-24	3.64995e-07	1	1.62125e-80	13.5
JC038	0	1.60694e-140	1.27867e-75	3.17335e-39	2.05474e-15	1	2.87078e-34	17.375
JC004	0	1.5325e-126	4.9948e-66	9.56473e-33	7.65451e-12	1	5.47331e-53	18.25
JC143	0	9.35361e-117	3.27339e-58	7.84427e-27	3.0618e-08	1	1.15259e-77	19
JC160	0	3.83124e-125	1.27867e-64	1.54949e-31	4.89888e-11	1	1.41726e-59	19.5
JC019	0	5.1422e-144	1.30936e-77	2.4676e-40	6.73297e-16	1	7.10778e-34	20.4
JC156	0	5.56503e-100	3.26743e-46	1.91162e-18	0.00182165	0.998178	2.84273e-105	21.5
JC136	0	8.91867e-103	2.0455e-48	4.25501e-20	0.000182464	0.999818	1.58031e-98	24.1667
JC142	0	1.00434e-137	1.27867e-73	7.93337e-38	1.28421e-14	1	7.19134e-39	30.75
JC109	0	8.71109e-96	1.77448e-46	1.97122e-20	1.54579e-05	0.999985	6.95611e-78	39.75
JC141	0	0	0	0	0	1	0	54.5
JC148	0	6.2771e-135	1.27867e-71	1.98334e-36	8.02633e-14	1	1.80143e-43	58.25
JC003	0	3.13855e-134	5.11467e-71	5.95003e-36	1.60527e-13	1	1.08086e-45	59.9167
JC130	0	9.13437e-110	1.27867e-53	7.56584e-24	1.16798e-06	0.999999	6.9968e-85	68.5
JC144	0	1.05228e-93	3.08914e-42	5.94999e-16	0.0336378	0.966362	2.78447e-110	74.75
JC139	0	1.96159e-131	8.18348e-69	2.67751e-34	1.60527e-12	1	1.9475e-52	101.333
JC015	0	1.82688e-110	3.19667e-54	2.52195e-24	5.83992e-07	0.999999	1.16613e-82	117.667
JC034	0	1.28555e-142	8.18348e-77	6.85443e-40	1.05203e-15	1	4.94585e-34	120.6
JC129	0	3.92319e-132	2.04587e-69	8.92504e-35	8.02633e-13	1	3.24583e-50	128.5
JC127	0	3.13855e-134	3.19667e-71	3.30557e-36	1.00329e-13	1	1.5027e-43	145
JC047	0	7.66248e-126	4.87773e-66	4.92013e-33	3.73755e-12	1	8.82484e-49	152
JC124	0	4.67681e-116	8.18348e-58	1.30738e-26	3.82725e-08	1	9.6145e-78	169.167
Choshu	0	0	0	0	0	0	1	192
JC030	0	0	0	0	0	0	1	0.75
JC016	0	0	0	0	0	0	1	1.75
JC113	0	0	0	0	0	0	1	4.2
JC042	0	0	0	0	0	0	1	4.5
JC122	0	0	0	0	0	0	1	6.375
JC026	0	0	0	0	0	0	1	12.875
JC151	0	0	0	0	0	0	1	15
JC040	0	0	0	0	0	0	1	15.7
JC033	0	0	0	0	0	0	1	16
JC103	0	4.63897e-184	5.37156e-110	7.07661e-67	1.51852e-36	1.64098e-13	1	16.5
JC110	0	0	0	0	0	0	1	17.7
JC126	0	0	0	0	0	0	1	25.5
JC037	0	0	0	0	0	0	1	26.75
JC105	0	0	0	0	0	0	1	34
JC007	0	2.58495e-189	2.99317e-114	1.77447e-70	1.35385e-39	5.71497e-16	1	35.4375
JC152	0	0	0	0	0	0	1	42
JC137	0	0	0	0	0	0	1	43.75
JC014	0	0	0	0	0	0	1	46.625
JC049	0	0	0	0	0	0	1	46.75
JC023	0	0	0	0	0	0	1	47.375
JC121	0	1.54942e-188	8.97054e-114	3.54539e-70	2.02874e-39	6.85111e-16	1	48
JC157	0	0	0	0	0	0	1	50
JC036	0	0	0	0	0	0	1	52.375
JC006	0	0	0	0	0	0	1	53.2222
JC027	0	0	0	0	0	0	1	54
JC052	0	0	0	0	0	0	1	55.4
JC102	0	0	0	0	0	0	1	58
JC048	0	0	0	0	0	0	1	59
JC116	0	0	0	0	0	0	1	64.1667
JC013	0	0	0	0	0	0	1	66.2
JC104	0	4.63897e-184	5.37156e-110	7.07661e-67	1.51852e-36	1.64098e-13	1	67.25
JC035	0	0	0	0	0	0	1	68
JC149	0	0	0	0	0	0	1	75.6667
JC115	0	0	0	0	0	0	1	95
JC123	0	0	0	0	0	0	1	99.25
JC107	0	0	0	0	0	0	1	99.5
JC050	0	0	0	0	0	0	1	116.812
JC145	0	0	0	0	0	0	1	117.5
JC111	0	0	0	0	0	0	1	124.5
JC018	0	1.54551e-174	3.41334e-105	9.12816e-65	2.94475e-36	1.79144e-14	1	128.75
JC106	0	0	0	0	0	0	1	143
JC133	0	0	0	0	0	0	1	162.667
JC117	0	0	0	0	0	0	1	178.75
JC128	0	0	0	0	0	0	1	193.25
JC146	0	0	0	0	0	0	1	205
JC159	0	1.82122e-86	3.50389e-37	1.18632e-12	0.931493	0.0685066	2.23183e-127	4.66667
JC132	0	4.88716e-80	3.08102e-33	1.22244e-10	0.999849	0.000150597	4.62726e-146	84
JC009	NA	NA	NA	NA	NA	NA	NA	2.9
JC118	NA	NA	NA	NA	NA	NA	NA	0.25
JC010	NA	NA	NA	NA	NA	NA	NA	4.8
JC051	NA	NA	NA	NA	NA	NA	NA	7.5
JC053	NA	NA	NA	NA	NA	NA	NA	32.75
JC021	NA	NA	NA	NA	NA	NA	NA	52.6667
JC134	NA	NA	NA	NA	NA	NA	NA	91.5
JC056	NA	NA	NA	NA	NA	NA	NA	124
JC154	NA	NA	NA	NA	NA	NA	NA	143

## Sheet: Table_S6
Supplementary Table 6. Chr07_1778460 and Chr03_18847788 SNP genotypes and the number of egg masses in each line in the F1 population.
F1	Chr07_1778460 genotype							Chr03_18868794 genotype							No. of egg masses
	AAAAAA	AAAAAa	AAAAaa	AAAaaa	AAaaaa	Aaaaaa	aaaaaa	BBBBBB	BBBBBb	BBBBbb	BBBbbb	BBbbbb	Bbbbbb	bbbbbb
JRed	0	9.80797e-131	3.27339e-68	8.03254e-34	3.21053e-12	1	1.1685e-54	0	9.80797e-131	7.99168e-69	1.37732e-34	7.83821e-13	1	3.14003e-48	1.29412
JC054	0	2.51084e-136	3.27339e-72	1.28521e-36	8.21896e-14	1	1.86213e-45	0	2.39452e-122	5.23742e-62	2.25915e-29	1.25411e-09	1	1.32115e-70	0
JC008	0	3.74144e-118	3.27339e-59	1.56885e-27	1.22472e-08	1	2.30287e-75	0	9.13437e-110	2.04587e-53	1.36185e-23	1.86877e-06	0.999998	5.03265e-87	0.166667
JC041	0	1.82688e-110	1.99792e-54	1.40108e-24	3.64995e-07	1	1.62125e-80	0	5.02168e-137	5.11467e-73	2.38001e-37	2.56843e-14	1	4.3148e-41	0.25
JC112	0	1.78402e-103	1.24867e-49	2.43238e-21	2.2277e-05	0.999978	7.0789e-90	0	3.65375e-111	1.27867e-54	1.51317e-24	4.67194e-07	1	1.39796e-82	0.25
JC046	0	8.22752e-147	1.30936e-79	9.87038e-42	1.07728e-16	1	2.83743e-29	0	8.03469e-140	3.19667e-75	5.28891e-39	2.56843e-15	1	2.39471e-34	0.333333
JC032	0	5.86164e-77	1.49255e-34	5.91621e-13	0.0968718	0.903128	6.50652e-93	0	2.85439e-106	1.30931e-50	1.83843e-21	3.73741e-05	0.999963	5.44051e-96	0.333333
JC135	0	2.39452e-122	3.12175e-63	6.64217e-31	7.4751e-11	1	9.54037e-58	0	1.19726e-121	1.30936e-61	3.76525e-29	1.56764e-09	1	1.10206e-70	0.5
JC055	0	1.19726e-121	1.30936e-61	3.76525e-29	1.56764e-09	1	1.10206e-70	0	5.56883e-100	2.04354e-46	1.06274e-18	0.00113931	0.998861	3.95489e-103	0.5
JC025	0	0	0	0	0	1	0	0	1.56928e-133	1.27867e-70	9.91671e-36	2.00658e-13	1	9.01619e-46	0.75
JC125	0	1.1692e-114	1.30936e-56	1.17664e-25	1.5309e-07	1	3.46122e-82	0	9.80797e-131	2.04587e-68	4.46252e-34	2.00658e-12	1	1.62454e-52	0.75
JC108	0	1.56928e-133	5.23742e-70	5.78343e-35	8.21896e-13	1	3.35519e-52	0	9.35361e-117	2.04587e-58	4.35793e-27	1.91363e-08	1	1.60242e-75	0.75
JC031	0	1.95484e-94	4.7012e-42	1.93391e-15	0.102383	0.897617	1.15381e-116	0	1.21212e-84	6.62803e-38	4.09512e-14	0.0881016	0.911898	9.29501e-103	0.833333
JC045	0	1.00434e-137	5.23742e-73	4.62674e-37	5.26014e-14	1	2.67611e-45	0	1.02844e-144	2.04587e-78	4.56962e-41	2.10405e-16	1	1.64697e-29	1
JC147	0	4.56717e-109	1.30935e-52	7.35396e-23	5.98005e-06	0.999994	2.17192e-91	0	1.10203e-89	2.07054e-39	4.98507e-14	0.352283	0.647717	2.33992e-117	1.5
JC039	0	2.39452e-122	3.27339e-62	1.25508e-29	7.83821e-10	1	1.83677e-68	0	3.48413e-97	2.97682e-46	1.3408e-19	0.000103727	0.999896	1.92447e-88	3
JC155	0	9.80797e-131	3.27339e-68	8.03254e-34	3.21053e-12	1	1.1685e-54	0	1.1692e-114	8.18348e-57	6.53689e-26	9.56813e-08	1	4.81206e-80	4
JC028	0	1.82688e-110	1.13569e-56	2.18005e-27	2.07476e-09	1	6.08097e-57	0	2.99316e-120	3.19667e-61	3.2281e-29	9.56813e-10	1	1.48223e-66	11
JC143	0	4.78905e-123	1.30936e-62	7.5305e-30	6.27057e-10	1	2.20192e-68	0	9.35361e-117	3.27339e-58	7.84427e-27	3.0618e-08	1	1.15259e-77	19
JC160	0	2.45199e-129	5.23742e-67	7.22928e-33	1.28421e-11	1	4.20659e-59	0	3.83124e-125	1.27867e-64	1.54949e-31	4.89888e-11	1	1.41726e-59	19.5
JC019	0	1.82687e-110	1.30935e-53	1.4708e-23	2.39203e-06	0.999998	4.33952e-89	0	5.1422e-144	1.30936e-77	2.4676e-40	6.73297e-16	1	7.10778e-34	20.4
JC156	0	2.923e-113	2.09497e-55	1.05898e-24	6.1236e-07	0.999999	1.24604e-86	0	5.56503e-100	3.26743e-46	1.91162e-18	0.00182165	0.998178	2.84273e-105	21.5
JC109	0	1.87072e-117	1.30936e-58	4.70656e-27	2.44944e-08	1	1.38172e-77	0	8.71109e-96	1.77448e-46	1.97122e-20	1.54579e-05	0.999985	6.95611e-78	39.75
JC141	0	7.3075e-112	2.09497e-54	5.29488e-24	1.5309e-06	0.999998	6.23642e-89	0	0	0	0	0	1	0	54.5
JC016	0	1.56928e-133	5.23742e-70	5.78343e-35	8.21896e-13	1	3.35519e-52	0	0	0	0	0	0	1	1.75
JC042	0	2.3384e-115	5.23742e-57	7.05985e-26	1.22472e-07	1	4.14931e-82	0	0	0	0	0	0	1	4.5
JC026	0	9.35361e-117	5.23742e-58	1.41197e-26	4.89888e-08	1	8.29032e-80	0	0	0	0	0	0	1	12.875
JC151	0	3.74144e-118	5.23742e-59	2.82394e-27	1.95955e-08	1	1.65641e-77	0	0	0	0	0	0	1	15
JC103	0	1.4615e-112	5.23742e-55	1.76496e-24	7.6545e-07	0.999999	1.0394e-86	0	4.63897e-184	5.37156e-110	7.07661e-67	1.51852e-36	1.64098e-13	1	16.5
JC105	0	1.28555e-142	1.30936e-76	1.2338e-39	1.68324e-15	1	3.55745e-36	0	0	0	0	0	0	1	34
JC023	0	3.83124e-125	3.27339e-64	5.02034e-31	1.25411e-10	1	7.3324e-64	0	0	0	0	0	0	1	47.375
JC006	0	3.83124e-125	3.27339e-64	5.02034e-31	1.25411e-10	1	7.3324e-64	0	0	0	0	0	0	1	53.2222
JC048	0	4.78905e-123	2.09497e-62	1.35549e-29	1.00329e-09	1	1.5838e-70	0	0	0	0	0	0	1	59
JC116	0	1.226e-128	2.09497e-66	2.16878e-32	2.56843e-11	1	2.52396e-61	0	0	0	0	0	0	1	64.1667
JC013	0	1.82687e-110	8.18346e-54	8.17111e-24	1.49502e-06	0.999999	6.03315e-87	0	0	0	0	0	0	1	66.2
JC035	0	5.70882e-107	5.23727e-51	1.10307e-21	2.98995e-05	0.99997	6.52214e-96	0	0	0	0	0	0	1	68
JC149	0	1.226e-128	8.18348e-67	6.69378e-33	1.00329e-11	1	4.8785e-57	0	0	0	0	0	0	1	75.6667
JC115	0	1.1692e-114	8.18348e-57	6.53689e-26	9.56813e-08	1	4.81206e-80	0	0	0	0	0	0	1	95
JC123	0	4.01735e-139	1.27867e-74	1.58667e-38	5.13685e-15	1	1.43683e-36	0	0	0	0	0	0	1	99.25
JC145	0	3.06499e-127	1.30936e-65	6.0244e-32	4.01317e-11	1	1.75626e-61	0	0	0	0	0	0	1	117.5
JC111	0	4.6768e-116	2.09497e-57	4.23591e-26	9.79777e-08	1	4.97419e-82	0	0	0	0	0	0	1	124.5
JC133	0	1.60694e-140	3.27339e-75	1.02816e-38	5.26014e-15	1	1.48524e-38	0	0	0	0	0	0	1	162.667
JC138	0	0	0	0	0	0	1	0	6.42775e-142	3.27339e-76	2.05633e-39	2.10405e-15	1	2.96751e-36	2
JC120	0	0	0	0	0	0	1	0	1.02844e-144	3.27339e-78	8.22532e-41	3.36649e-16	1	1.18463e-31	4
JC043	0	0	0	0	0	0	1	0	8.03469e-140	1.30936e-74	3.08449e-38	1.05203e-14	1	8.91144e-41	5.375
JC150	0	0	0	0	0	0	1	0	1.82688e-110	5.11467e-54	4.53951e-24	9.34387e-07	0.999999	8.38776e-85	7.25
JC017	0	0	0	0	0	0	1	0	3.13855e-134	1.30936e-70	1.92781e-35	4.10948e-13	1	5.59198e-50	13.25
JC024	0	0	0	0	0	0	1	0	1.82688e-110	1.99792e-54	1.40108e-24	3.64995e-07	1	1.62125e-80	13.5
JC038	0	0	0	0	0	0	1	0	1.60694e-140	1.27867e-75	3.17335e-39	2.05474e-15	1	2.87078e-34	17.375
JC004	0	0	0	0	0	0	1	0	1.5325e-126	4.9948e-66	9.56473e-33	7.65451e-12	1	5.47331e-53	18.25
JC136	0	0	0	0	0	0	1	0	8.91867e-103	2.0455e-48	4.25501e-20	0.000182464	0.999818	1.58031e-98	24.1667
JC142	0	0	0	0	0	0	1	0	1.00434e-137	1.27867e-73	7.93337e-38	1.28421e-14	1	7.19134e-39	30.75
JC148	0	0	0	0	0	0	1	0	6.2771e-135	1.27867e-71	1.98334e-36	8.02633e-14	1	1.80143e-43	58.25
JC130	0	0	0	0	0	0	1	0	9.13437e-110	1.27867e-53	7.56584e-24	1.16798e-06	0.999999	6.9968e-85	68.5
JC144	0	0	0	0	0	0	1	0	1.05228e-93	3.08914e-42	5.94999e-16	0.0336378	0.966362	2.78447e-110	74.75
JC139	0	0	0	0	0	0	1	0	1.96159e-131	8.18348e-69	2.67751e-34	1.60527e-12	1	1.9475e-52	101.333
JC015	0	1.11165e-176	1.53447e-107	3.64761e-67	1.32381e-38	1.28855e-16	1	0	1.82688e-110	3.19667e-54	2.52195e-24	5.83992e-07	0.999999	1.16613e-82	117.667
JC034	0	0	0	0	0	0	1	0	1.28555e-142	8.18348e-77	6.85443e-40	1.05203e-15	1	4.94585e-34	120.6
JC129	0	0	0	0	0	0	1	0	3.92319e-132	2.04587e-69	8.92504e-35	8.02633e-13	1	3.24583e-50	128.5
JC127	0	2.58495e-189	2.99317e-114	1.77447e-70	1.35385e-39	5.71497e-16	1	0	3.13855e-134	3.19667e-71	3.30557e-36	1.00329e-13	1	1.5027e-43	145
JC047	0	1.54942e-188	8.97054e-114	3.54539e-70	2.02874e-39	6.85111e-16	1	0	7.66248e-126	4.87773e-66	4.92013e-33	3.73755e-12	1	8.82484e-49	152
JC124	0	0	0	0	0	0	1	0	4.67681e-116	8.18348e-58	1.30738e-26	3.82725e-08	1	9.6145e-78	169.167
Choshu	0	0	0	0	0	0	1	0	0	0	0	0	0	1	192
JC113	0	7.19481e-191	3.33241e-115	4.44506e-71	6.02917e-40	3.97668e-16	1	0	0	0	0	0	0	1	4.2
JC122	0	0	0	0	0	0	1	0	0	0	0	0	0	1	6.375
JC033	0	0	0	0	0	0	1	0	0	0	0	0	0	1	16
JC110	0	0	0	0	0	0	1	0	0	0	0	0	0	1	17.7
JC126	0	0	0	0	0	0	1	0	0	0	0	0	0	1	25.5
JC037	0	0	0	0	0	0	1	0	0	0	0	0	0	1	26.75
JC007	0	0	0	0	0	0	1	0	2.58495e-189	2.99317e-114	1.77447e-70	1.35385e-39	5.71497e-16	1	35.4375
JC152	0	0	0	0	0	0	1	0	0	0	0	0	0	1	42
JC137	0	0	0	0	0	0	1	0	0	0	0	0	0	1	43.75
JC014	0	0	0	0	0	0	1	0	0	0	0	0	0	1	46.625
JC049	0	0	0	0	0	0	1	0	0	0	0	0	0	1	46.75
JC121	0	0	0	0	0	0	1	0	1.54942e-188	8.97054e-114	3.54539e-70	2.02874e-39	6.85111e-16	1	48
JC157	0	0	0	0	0	0	1	0	0	0	0	0	0	1	50
JC036	0	4.2908e-162	1.446e-97	5.88723e-60	1.90352e-33	3.25949e-13	1	0	0	0	0	0	0	1	52.375
JC027	0	0	0	0	0	0	1	0	0	0	0	0	0	1	54
JC052	0	0	0	0	0	0	1	0	0	0	0	0	0	1	55.4
JC102	0	1.54942e-188	8.97054e-114	3.54539e-70	2.02874e-39	6.85111e-16	1	0	0	0	0	0	0	1	58
JC104	0	0	0	0	0	0	1	0	4.63897e-184	5.37156e-110	7.07661e-67	1.51852e-36	1.64098e-13	1	67.25
JC107	0	5.97297e-167	1.64896e-99	2.90353e-60	1.11139e-32	8.86199e-12	1	0	0	0	0	0	0	1	99.5
JC050	0	0	0	0	0	0	1	0	0	0	0	0	0	1	116.812
JC018	0	0	0	0	0	0	1	0	1.54551e-174	3.41334e-105	9.12816e-65	2.94475e-36	1.79144e-14	1	128.75
JC106	0	1.29118e-185	5.98036e-111	1.7727e-67	6.76248e-37	1.14185e-13	1	0	0	0	0	0	0	1	143
JC117	0	1.43313e-166	2.41482e-101	2.94951e-63	2.54311e-36	1.36084e-15	1	0	0	0	0	0	0	1	178.75
JC128	0	0	0	0	0	0	1	0	0	0	0	0	0	1	193.25
JC146	0	0	0	0	0	0	1	0	0	0	0	0	0	1	205
JC009	NA	NA	NA	NA	NA	NA	NA	NA	NA	NA	NA	NA	NA	NA	2.9
JC051	NA	NA	NA	NA	NA	NA	NA	NA	NA	NA	NA	NA	NA	NA	7.5
JC053	NA	NA	NA	NA	NA	NA	NA	NA	NA	NA	NA	NA	NA	NA	32.75
JC001	NA	NA	NA	NA	NA	NA	NA	0	1.19726e-121	8.18348e-62	2.09181e-29	9.79777e-10	1	1.53218e-68	4.66667
JC003	NA	NA	NA	NA	NA	NA	NA	0	3.13855e-134	5.11467e-71	5.95003e-36	1.60527e-13	1	1.08086e-45	59.9167
JC030	NA	NA	NA	NA	NA	NA	NA	0	0	0	0	0	0	1	0.75
JC040	NA	NA	NA	NA	NA	NA	NA	0	0	0	0	0	0	1	15.7
JC101	NA	NA	NA	NA	NA	NA	NA	0	1.35978e-91	7.2612e-43	1.43562e-17	0.000988344	0.999012	3.24229e-91	3.375
JC010	0	0	0	0	0	0	1	NA	NA	NA	NA	NA	NA	NA	4.8
JC021	0	0	0	0	0	0	1	NA	NA	NA	NA	NA	NA	NA	52.6667
JC056	0	0	0	0	0	0	1	NA	NA	NA	NA	NA	NA	NA	124
JC134	0	0	0	0	0	0	1	NA	NA	NA	NA	NA	NA	NA	91.5
JC154	0	0	0	0	0	0	1	NA	NA	NA	NA	NA	NA	NA	143
JC118	0	7.66248e-126	1.30936e-64	3.0122e-31	1.00329e-10	1	8.79008e-64	NA	NA	NA	NA	NA	NA	NA	0.25
JC132	0	0	0	0	0	0	1	0	4.88716e-80	3.08102e-33	1.22244e-10	0.999849	0.000150597	4.62726e-146	84
JC159	0	1.1692e-114	3.19667e-57	2.01756e-26	3.73755e-08	1	9.30112e-76	0	1.82122e-86	3.50389e-37	1.18632e-12	0.931493	0.0685066	2.23183e-127	4.66667

## Sheet: Table_S7
Supplementary Table 7. Primers used in this study.
Target	Forward	Reverse
Chr03	5′-GTCAATACTTATAATGCATTTCTAAATGCACA-3′	5′-TATGTGAGCTCATTCGGTCTGC-3′
Chr07	5′-GGTGGCCTTAGTTAACCGGTTGGC-3′	5′-CATCAAATTTTCAAACAAAGGGAAGTGC-3′
SSII	5′-GATCGGAGTCATTTCGTTGAG-3′	5′-GCAGGAGTCGACATTGAAG-3′

## Sheet: Table_S8
Supplementary Table 8. Segregation ratios of the simplex marker in one or both parents and the number of selected simplex SNPs.
	J-Red genotype	Choshu genotype	Segregation ratios in the F1 population	No. of selected SNPs
Simplex (Aaaaaa) in one parent	0/0 (aaaaaa)	0/1（Aaaaaa）	aaaaaa：Aaaaaa ＝1：1	7515
	0/1 (Aaaaaa)	0/0（aaaaaa）	Aaaaaa：aaaaaa ＝1：1	8053
Simplex (AAAAAa) in one parent	1/1 (AAAAAA)	0/1（AAAAAa）	AAAAAA : AAAAAa＝1：1	2629
	0/1 (AAAAAa)	1/1（AAAAAA）	AAAAAa : AAAAAA ＝1：1	2960
Simplex (Aaaaaa) in both parents	0/1 (Aaaaaa)	0/1（Aaaaaa）	aaaaaa： AAaaaa or Aaaaaa＝1：3	7528
Simplex (Aaaaaa) in both parents	0/1 (AAAAAa)	0/1（AAAAAa）	AAAAAA： AAAAAa or AAAAaa＝1：3	5201
Total				33886
